# Supplementary material
Source: PubMed Central journal article supplement (PMC5970052)
Supplement: NIHMS951519-supplement-Major_Resources_Table.pdf [file NIHMS951519-supplement-Major_Resources_Table.pdf]

## MAJOR RESOURCES TABLES

### CaMKII (Ca<sup>2+</sup>/calmodulin-dependent kinase II) in mitochondria of smooth muscle cells controls mitochondrial mobility, migration and neointima formation

Emily K. Nguyen, Olha M. Koval, Paige Noble, Kim Broadhurst, Chantal Allamargot, Meng Wu,

Stefan Strack, William H. Thiel, Isabella M. Grumbach

#### Animals

| Species/Strain                | Vendor or Source                 | Background Strain | Sex  |
|-------------------------------|----------------------------------|-------------------|------|
| C57 Bl6 mouse                 | Jackson Labs                     | C57               | Male |
| Miro-1 <sup>fl/fl</sup> mouse | Dr. Janet Shaw,<br>Univ. of Utah | C57               | Male |
| MCU <sup>-/-</sup> mouse      | Dr. Toren Finkel, NIH            | CD1               | Male |
| CD1 mouse                     | Charles River                    | CD1               | Male |

#### Antibody

| Antibody          | Company                     | Catalog #       | Species | Working Concentration | Application |
|-------------------|-----------------------------|-----------------|---------|-----------------------|-------------|
| GAPDH             | Cell Signaling              | 2118            | Rabbit  | 0.05 µg/mL            | WB          |
| p-CaMKII          | Cell Signaling              | 12716           | Rabbit  | 0.70 µg/mL            | WB          |
| COX IV            | Cell Signaling              | 4844            | Rabbit  | 0.1 µg/mL             | WB          |
| Drp1              | Cell Signaling              | 8570            | Rabbit  | 0.03 µg/mL            | WB          |
| p-MLC             | Cell Signaling              | 3671            | Rabbit  | 0.025µg/mL            | IF          |
| p-FAK             | Cell Signaling              | 3281            | Rabbit  | 0.3 µg/mL             | WB          |
| FAK               | Cell Signaling              | 13009           | Rabbit  | 0.07µg/mL             | WB          |
| PCNA              | Cell Signaling              | 13110           | Rabbit  | 1ug/mL                | IF          |
| HA                | Cell Signaling              | 2367            | Mouse   | 2µg/mL                | IF          |
| CaMKII            | EMD Millipore               | 07-1496         | Rabbit  | 2µg/mL                | WB          |
| CaMKII            | LifeSpan                    | LS-C100735/5122 | Rabbit  | 15µg/mL               | IF          |
| CaMKIIN           | Aviva                       | OAAB07385       | Rabbit  | 15µg/mL               | IF          |
| Mitochondria MTC0 | Abcam                       | 3298            | Rabbit  | 10µg/mL               | IF          |
| MCU               | Prestige                    | HPA016480       | Rabbit  | 1µg/mL                | WB          |
| Vinculin          | ThermoFisher                | MA5-11690       | Mouse   | 7.5µg/mL              | IF          |
| Miro-1            | Antibodies Online           | ABIN635090      | Rabbit  | 1µg/mL                | WB          |
| GFP               | ThermoFisher                | A6455           | Mouse   | 1µg/mL                | WB          |
| pSer92 MCU        | Anderson Lab, Johns Hopkins | -               | Rabbit  | 5 µg/mL               | WB          |

**Cultured Cells**

| Name                                              | Vendor or Source      | Sex (F, M, or unknown) |
|---------------------------------------------------|-----------------------|------------------------|
| Primary mouse aortic vascular smooth muscle cells | See all animals above | Male                   |
