# Supplementary material
Source: PubMed Central journal article supplement (PMC5970052)
Supplement: NIHMS951519-supplement-Mitochondrial_CaMKII_regulation_of_mitochondrial_Ca2___mobility__and_VSMC_migration.pdf [file NIHMS951519-supplement-Mitochondrial_CaMKII_regulation_of_mitochondrial_Ca2___mobility__and_VSMC_migration.pdf]

## Graphical Abstract

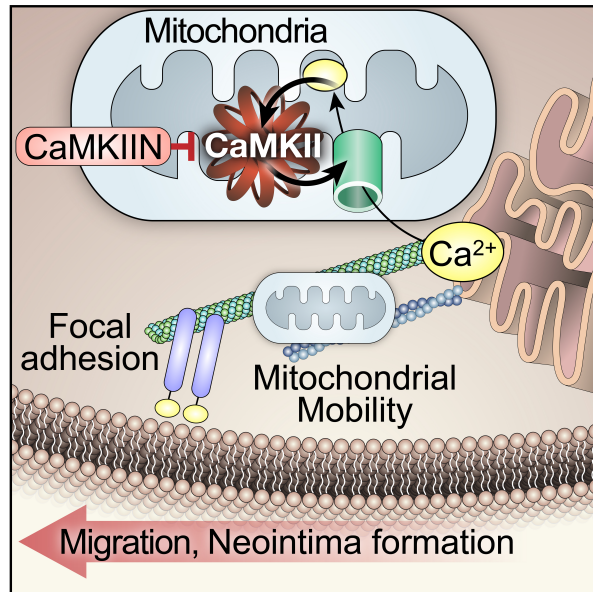

**Graphical Abstract. Mitochondrial CaMKII regulation of mitochondrial Ca<sup>2+</sup>, mobility, and VSMC migration.** mtCaMKII regulates a feed-forwards circuit that promotes mitochondrial Ca<sup>2+</sup> uptake. Inhibition of mtCaMKII leads to decreased mitochondrial Ca<sup>2+</sup> uptake, leading to decreased Ca<sup>2+</sup> clearance in the cytosol and mitochondrial arrest. This prevents mitochondria from translocating to focal adhesions, thus inhibiting VSMC migration and neointimal formation.
